# Supplementary material for: Detection of photogenotoxicity in skin and eye in rat with the photo comet assay
Source: Royal Society of Chemistry journal article supplement (doi:10.1039/b715756h), 2008-01-09
Supplement: b715756h.pdf [file b715756h.pdf]

## Supplementary information

Table 1 Summary of the parameters from the mass spectrometer of each compound. The scan time was 0.10 sec in each case.

| Compound          | Selected Ions Q1,Q3    |                      | MS-MS conditions                   |                                    |
|-------------------|------------------------|----------------------|------------------------------------|------------------------------------|
|                   | Precursor ion m/z (Q1) | Product ion m/z (Q3) | Collision energy (eV)              | Cone (eV)                          |
| Sparfloxacin      | 392.85                 | 291.86+348.92        | 22                                 | 40                                 |
| Dacarbazine       | 182.83                 | 165.89               | 11                                 | 34                                 |
| Chlorpromazine    | 318.73                 | 86.09                | 19                                 | 40                                 |
| Promazine         | 284.81                 | 211.82+86.13         | 18                                 | 32                                 |
| 8-Methoxypsoralen | 216.69                 | 173.81+201.84        | 24                                 | 48                                 |
| BJX482            | 358.87                 | 245.86               | 29 <sup>1)</sup> /30 <sup>2)</sup> | 48 <sup>1)</sup> /40 <sup>2)</sup> |

<sup>1)</sup>8-methoxypsoralen, dacarbazine, promazine; <sup>2)</sup>chlorpromazine, sparfloxacin

Selected Ions Q1, Q3: precursor and product ions selected by the first and third quadrupole mass analyzer, respectively

MS-MS: tandem mass spectrometer (in this case a triple quadrupole tandem mass spectrometer)

m/z: mass-to-charge ratio

Table 2 Relative viability of cells from the epidermis following the isolation with thermolysine and trypsin, determined by trypan blue

| Treatment                        | Relative viability (%) |          |
|----------------------------------|------------------------|----------|
|                                  | Skin dorsal area       | Skin ear |
| <b>Sparfloxacin</b>              |                        |          |
| 1% CMC;7.2 J/cm <sup>2</sup>     | 88±4.7'                | 86±1.7'  |
| 1000 mg/kg; no UVA               | 87±3.8'                | 91±4.2'  |
| 1000 mg/kg;7.2 J/cm <sup>2</sup> | 86±2.4'                | 96±1.2'  |
| <b>Dacarbazine</b>               |                        |          |
| 1% CMC;7.2 J/cm <sup>2</sup>     | 92±4.7''               | 95±3.1'' |
| 250 mg/kg; no UVA                | 86±3.4'                | 97±1.2'  |
| 250 mg/kg;7.2 J/cm <sup>2</sup>  | 85±3.2'                | 93±2.2'  |
| <b>Chlorpromazine</b>            |                        |          |
| 1% CMC;7.2 J/cm <sup>2</sup>     | 81±4.1''               | 91±3.2'' |
| 75 mg/kg; no UVA                 | 88±6.0'                | 93±2.9'  |
| 75 mg/kg;7.2 J/cm <sup>2</sup>   | 88±7.0'                | 92±3.8'  |
| <b>Promazine</b>                 |                        |          |
| 1%CMC;7.2 J/cm <sup>2</sup>      | 74±9.5''               | 97±1.0'' |
| 75 mg/kg; no UVA                 | 87±3.6'                | 93±1.4'  |
| 75 mg/kg;7.2 J/cm <sup>2</sup>   | 87±3.8'                | 88±3.5'  |
| <b>8-Methoxypsoralen</b>         |                        |          |
| 1%CMC;7.2 J/cm <sup>2</sup>      | 83±7.2''               | 93±2.3'' |
| 300 mg/kg; no UVA                | 90±3.4'                | 92±4.0'  |
| 300 mg/kg;7.2 J/cm <sup>2</sup>  | 91±1.8'                | 95±1.9'  |

mean±standard derivation of '6 or ''4 animals

Table 3 Comet Assay analysis of cornea, retina and the skin of the dorsal area and ears shown for each animal and as mean value  $\pm$ SD of each treatment group.

| Sparfloxacin                  |                      | Dacarbazine                   |                     | Chlorthromazine               |                    | Promazine                     |                    | 8-Methoxyypsoralen            |                     |
|-------------------------------|----------------------|-------------------------------|---------------------|-------------------------------|--------------------|-------------------------------|--------------------|-------------------------------|---------------------|
| 1%CMC;<br>7 J/cm <sup>2</sup> | 1000mg/kg;<br>no UVA | 1%CMC;<br>7 J/cm <sup>2</sup> | 250mg/kg;<br>no UVA | 1%CMC;<br>7 J/cm <sup>2</sup> | 75mg/kg;<br>no UVA | 1%CMC;<br>7 J/cm <sup>2</sup> | 75mg/kg;<br>no UVA | 1%CMC;<br>7 J/cm <sup>2</sup> | 300mg/kg;<br>no UVA |
| Cornea                        |                      | Cornea                        |                     | Cornea                        |                    | Cornea                        |                    | Cornea                        |                     |
| 0.86                          | 0.21                 | n.a.                          | 0.58                | 0.20                          | 0.46               | 0.43                          | 0.56               | 0.49                          | 0.59                |
| 0.06                          | 0.31                 | 0.81                          | 0.49                | 0.24                          | 0.29               | 0.39                          | 0.32               | 0.59                          | 0.23                |
| 0.40                          | 0.10                 | 0.43                          | 0.91                | 0.22                          | 0.35               | 0.32                          | 0.16               | 0.66                          | 0.43                |
| 0.14                          | 0.85                 | 0.40                          | 0.78                | 0.26                          | 0.29               | 0.56                          | 0.22               | 0.80                          | 0.53                |
| 0.14                          | 0.74                 | 0.60                          | 0.82                | 0.18                          | 0.23               | 0.31                          | 0.54               | 0.33                          | 0.18                |
| 0.15                          | 0.93                 | 1.21                          | n.a.                | 0.20                          | 0.24               | 0.40                          | 0.42               | 0.40                          | 0.30                |
| 0.29 $\pm$ 0.30               | 0.52 $\pm$ 0.36      | 0.76 $\pm$ 0.27               | 1.34 $\pm$ 0.52*    | 0.23 $\pm$ 0.03               | 0.30 $\pm$ 0.10    | 0.42 $\pm$ 0.10               | 0.33 $\pm$ 0.14    | 0.63 $\pm$ 0.13               | 0.42 $\pm$ 0.13     |
| Retina                        |                      | Retina                        |                     | Retina                        |                    | Retina                        |                    | Retina                        |                     |
| 0.20                          | 0.19                 | 0.33                          | 0.38                | 0.19                          | 0.27               | 0.24                          | 0.13               | 0.27                          | 0.34                |
| 0.13                          | 0.21                 | 0.37                          | 0.36                | 0.25                          | 0.21               | 0.13                          | 0.15               | 0.25                          | 0.35                |
| 0.18                          | 0.24                 | 0.54                          | 0.43                | 0.17                          | 0.13               | 0.15                          | 0.14               | 0.27                          | 0.29                |
| 0.23                          | 0.44                 | 0.43                          | 0.36                | 0.23                          | 0.15               | 0.15                          | 0.16               | 0.23                          | 0.32                |
| 0.12                          | 0.21                 | 0.39                          | 0.39                | 0.16                          | 0.22               | 0.15                          | 0.20               | 0.34                          | 0.24                |
| 0.13                          | 0.22                 | 0.27                          | 0.27                | 0.15                          | 0.15               | 0.12                          | 0.12               | 0.32                          | 0.26                |
| 0.17 $\pm$ 0.04               | 0.25 $\pm$ 0.10      | 0.42 $\pm$ 0.09               | 0.36 $\pm$ 0.05     | 0.21 $\pm$ 0.04               | 0.18 $\pm$ 0.05    | 0.17 $\pm$ 0.05               | 0.14 $\pm$ 0.01    | 0.25 $\pm$ 0.02               | 0.32 $\pm$ 0.02     |
| Skin dorsal area              |                      | Skin dorsal area              |                     | Skin dorsal area              |                    | Skin dorsal area              |                    | Skin dorsal area              |                     |
| 1.85                          | 0.74                 | n.a.                          | 1.24                | 1.62                          | 1.39               | n.a.                          | 0.42               | 1.49                          | 1.25                |
| 1.05                          | 0.41                 | 0.35                          | 1.84                | 2.32                          | 0.99               | 0.68                          | 0.20               | n.a.                          | 1.49                |
| 0.96                          | 1.66                 | 0.37                          | 1.13                | 1.72                          | 1.08               | 0.49                          | 0.34               | 1.16                          | 0.90                |
| 0.93                          | 0.98                 | 0.39                          | 1.06                | 1.66                          | 1.61               | 0.09                          | 0.20               | 1.32                          | 0.59                |
| 0.77                          | 0.49                 | 0.79                          | 0.79                | 2.26                          | 2.26               | 0.31                          | 0.22               | 1.34                          | 0.24                |
| 0.82                          | 0.66                 | 0.65                          | 13.08               | 1.26                          | 1.26               | 0.37                          | 0.22               | 1.12                          | 0.34                |
| 1.06 $\pm$ 0.40               | 0.82 $\pm$ 0.45      | 1.12 $\pm$ 0.42               | 13.64 $\pm$ 1.54*** | 1.83 $\pm$ 0.33               | 1.43 $\pm$ 0.46    | 0.42 $\pm$ 0.30               | 0.31 $\pm$ 0.09    | 1.32 $\pm$ 0.16               | 1.11 $\pm$ 0.33     |
| Skin ear                      |                      | Skin ear                      |                     | Skin ear                      |                    | Skin ear                      |                    | Skin ear                      |                     |
| 1.10                          | 0.81                 | 0.68                          | 0.37                | 1.12                          | 1.96               | 0.21                          | 0.37               | 1.16                          | 1.82                |
| 0.74                          | 0.54                 | 0.29                          | 0.49                | 1.33                          | 2.58               | 0.33                          | 0.37               | 1.41                          | 1.23                |
| 0.83                          | 1.18                 | 0.66                          | 0.58                | 2.03                          | 2.36               | 0.19                          | 0.20               | 1.07                          | 1.48                |
| 1.23                          | 1.17                 | 0.30                          | 0.67                | 2.36                          | n.a.               | 0.31                          | 0.41               | 1.73                          | 1.62                |
| 1.09                          | 1.11                 | 0.41                          | 0.41                | 1.72                          | 1.72               | 0.27                          | 0.27               | 1.71                          | 1.44                |
| 1.46                          | 0.52                 | 0.23                          | 17.56               | 0.72                          | 0.72               | 0.24                          | 0.24               | 1.28                          | 0.33                |
| 1.08 $\pm$ 0.26               | 0.89 $\pm$ 0.31      | 0.48 $\pm$ 0.22               | 15.89 $\pm$ 2.95*** | 1.71 $\pm$ 0.58               | 1.87 $\pm$ 0.72    | 0.26 $\pm$ 0.07               | 0.31 $\pm$ 0.08    | 1.34 $\pm$ 0.30               | 1.52 $\pm$ 0.24     |
|                               |                      |                               |                     |                               |                    |                               |                    |                               | 0.28 $\pm$ 0.11***  |

n.a. not analyzed due to artefacts and cell debris

\*\*\*p<0.001, \*\*p<0.01, \*p<0.05; showing significant differences of the treated irradiated group vs the vehicle irradiated and the treated non irradiated group

bold numbers indicate the mean $\pm$ standard deviation of the above mentioned individual data
